# Supplementary material
Source: Springer Nature journal article supplement (https://www.springermedizin.de/resource/supplementary/12889_2011_3138_MOESM2_ESM.pdf/9488334)

### Liquids

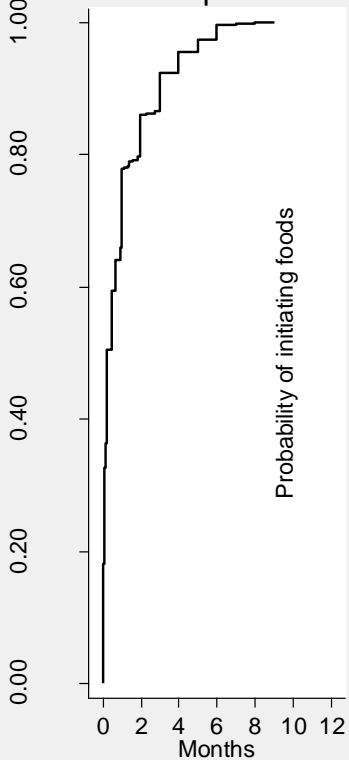

### Solids

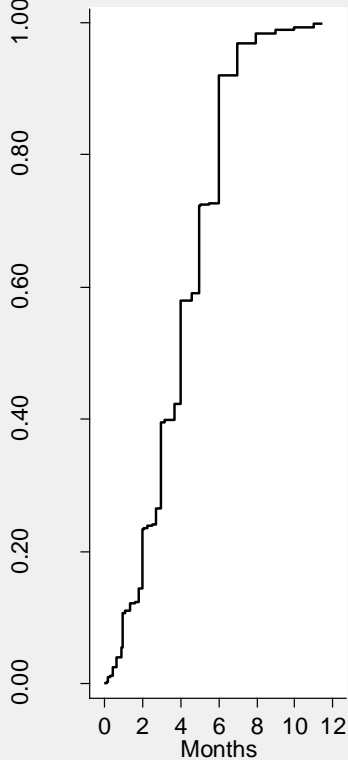

### Liquids & Solids

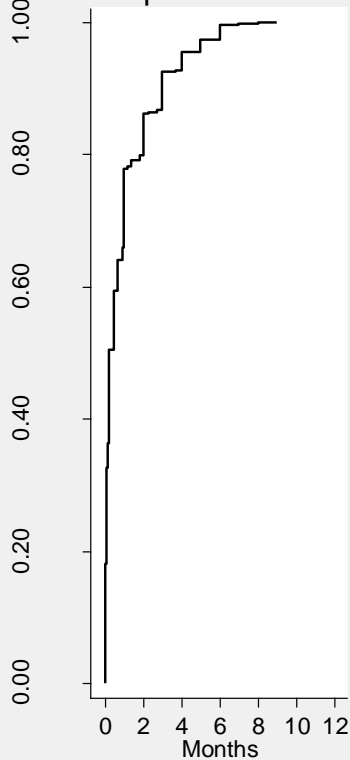

Supplement: MOESM2 [file 9488334]
